# Supplementary material
Source: Research Square preprint supplement (doi:10.21203/rs.3.rs-10071183/v1)

**Table3. Subgroup analysis for the association between NPS (as a continuous variable, per 1‑point increase) and 3‑year all‑cause mortality. HR, hazard ratio; CI, confidence interval; HT, hypertension; CKD, chronic kidney disease; Revas, revascularization; Hb, hemoglobin; ICU, intensive care unit.**


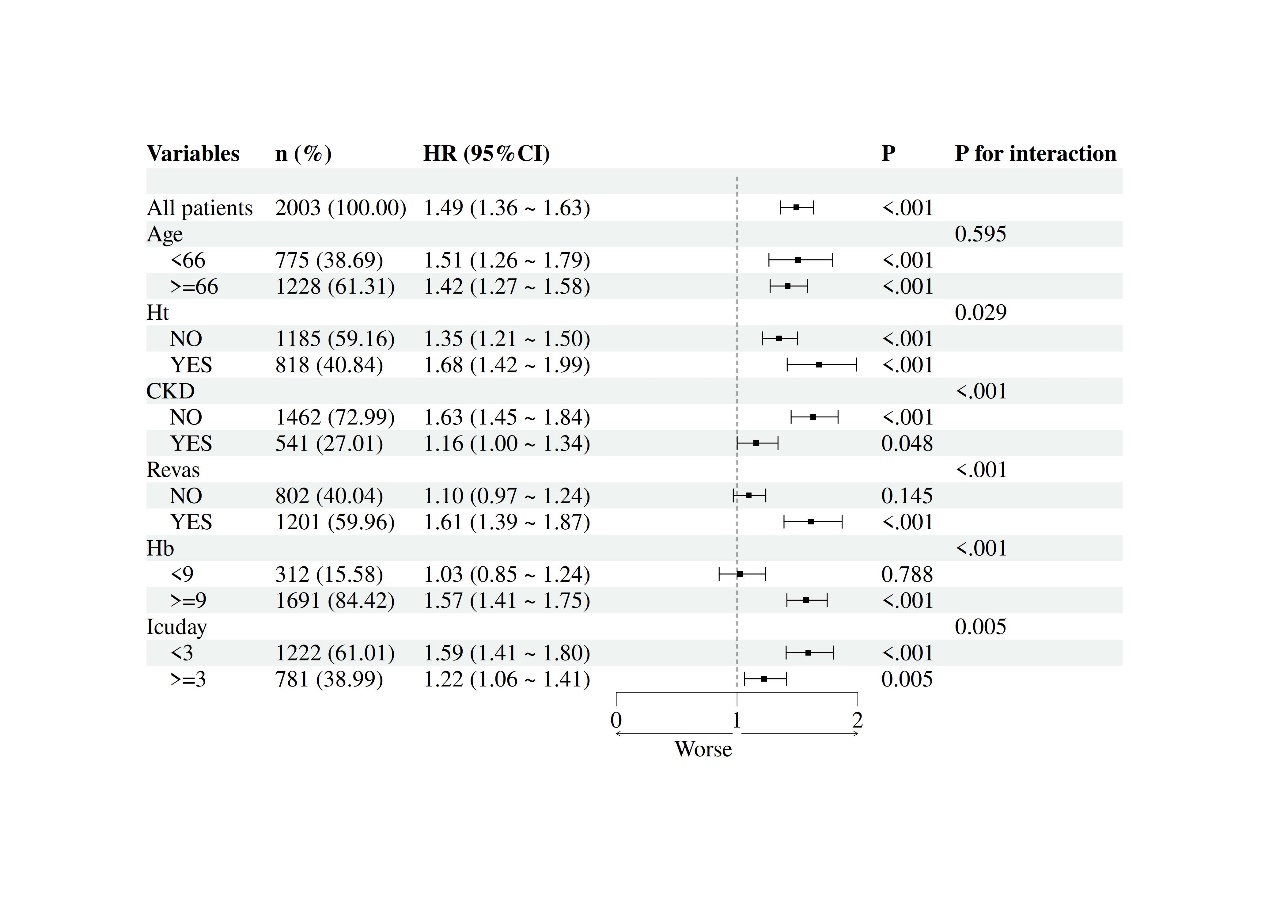

Supplement: Supplementary file 1 [file 4a7a9940edec88f1c8f2b652.docx]
